# Supplementary material for: Stimulation of medulloblastoma stem cells differentiation by a peptidomimetic targeting neuropilin-1
Source: PubMed Central journal article supplement (PMC5880606; doi:10.18632/oncotarget.24521), 2018-02-16
Supplement: oncotarget-09-15312-s001.pdf [file oncotarget-09-15312-s001.pdf]

## Stimulation of medulloblastoma stem cells differentiation by a peptidomimetic targeting neuropilin-1

### SUPPLEMENTARY MATERIALS

**Supplementary Table 1: Western blot densitometries of proteins CD133, CD15 and NF-M expression for differentiated cells and MB stem cells**

| Protein<br>Repetition | CD133 |       |       | CD15  |       |       | NF-M  |       |       |
|-----------------------|-------|-------|-------|-------|-------|-------|-------|-------|-------|
|                       | 1     | 2     | 3     | 1     | 2     | 3     | 1     | 2     | 3     |
| DAOY                  | -     | -     | -     | 1.000 | 1.000 | 1.000 | 1.000 | 1.000 | 1.000 |
| DAOY-MS               | -     | -     | -     | 1.193 | 1.461 | 2.046 | 0.790 | 1.367 | 0.962 |
| D283                  | 1.000 | 1.000 | 1.000 | 1.000 | 1.000 | 1.000 | 1.000 | 1.000 | 1.000 |
| D283-MS               | 1.325 | 1.426 | 1.567 | 1.189 | 1.324 | 1.469 | 0.702 | 0.561 | 0.220 |
| D341                  | 1.000 | 1.000 | 1.000 | 1.000 | 1.000 | 1.000 | 1.000 | 1.000 | 1.000 |
| D341-MS               | 1.957 | 1.500 | 2.659 | 1.186 | 1.285 | 1.416 | 0.024 | 0.478 | 0.580 |

“-”: no detectable,  $n = 3$ .

**Supplementary Table 2: Western blot densitometries of proteins NRP-1, NRP2 and Sox2 expression for differentiated cells and MB stem cells**

| Protein<br>Repetition | NRP-1 |       |       | NRP-2 |       |       | Sox2  |       |       |       |
|-----------------------|-------|-------|-------|-------|-------|-------|-------|-------|-------|-------|
|                       | 1     | 2     | 3     | 1     | 2     | 3     | 1     | 2     | 3     | 4     |
| DAOY                  | 1.000 | 1.000 | 1.000 | 1.000 | 1.000 | 1.000 | 1.000 | 1.000 | 1.000 | 1.000 |
| DAOY-MS               | 1.863 | 2.815 | 1.918 | 2.311 | 0.446 | 2.085 | 2.904 | 1.549 | 1.791 | 7.458 |
| D283                  | 1.000 | 1.000 | 1.000 | 1.000 | 1.000 | 1.000 | -     | -     | -     | -     |
| D283-MS               | 3.542 | 1.687 | 1.312 | 0.604 | 0.508 | 0.847 | -     | -     | -     | -     |
| D341                  | 1.000 | 1.000 | 1.000 | 1.000 | 1.000 | 1.000 | -     | -     | -     | -     |
| D341-MS               | 2.275 | 1.483 | 1.245 | 0.641 | 0.410 | 0.476 | -     | -     | -     | -     |

“-”: no detectable,  $n \geq 3$ .

**Supplementary Table 3: Western blot densitometries of the effect of peptidomimetic on expression of neuropilins and phenotype markers for MB stem cells of MB**

| Protein    |          | NRP-1 |       |       | NRP-2 |       |       | Sox2  |       |       |
|------------|----------|-------|-------|-------|-------|-------|-------|-------|-------|-------|
| Repetition |          | 1     | 2     | 3     | 1     | 2     | 3     | 1     | 2     | 3     |
| DAOY-MS    | T-       | 1.000 | 1.000 | 1.000 | 1.000 | 1.000 | 1.000 | 1.000 | 1.000 | 1.000 |
|            | tufstine | 0.943 | 1.170 | 1.074 | 0.866 | 1.583 | 1.791 | 0.852 | 0.908 | 1.038 |
|            | MR438    | 0.631 | 0.610 | 0.832 | 0.757 | 1.682 | 1.449 | 0.582 | 0.628 | 0.730 |
| D283-MS    | T-       | 1.000 | 1.000 | 1.000 | 1.000 | 1.000 | 1.000 | -     | -     | -     |
|            | tufstine | 0.592 | 0.325 | 1.151 | 1.521 | 0.701 | 0.789 | -     | -     | -     |
|            | MR438    | 0.168 | 0.688 | 0.874 | 3.344 | 0.611 | 0.663 | -     | -     | -     |
| D341-MS    | T-       | 1.000 | 1.000 | 1.000 | 1.000 | 1.000 | 1.000 | -     | -     | -     |
|            | tufstine | 0.372 | 0.553 | 0.762 | 0.810 | 1.167 | 0.960 | -     | -     | -     |
|            | MR438    | 0.493 | 0.865 | 0.350 | 0.922 | 1.023 | 0.962 | -     | -     | -     |

| Protein    |          | CD15  |       |       | CD133 |       |       | NF-M  |       |       |
|------------|----------|-------|-------|-------|-------|-------|-------|-------|-------|-------|
| Repetition |          | 1     | 2     | 3     | 1     | 2     | 3     | 1     | 2     | 3     |
| DAOY-MS    | T-       | 1.000 | 1.000 | 1.000 | -     | -     | -     | 1.000 | 1.000 | 1.000 |
|            | tufstine | 0.629 | 0.964 | 1.095 | -     | -     | -     | 1.656 | 2.846 | 1.434 |
|            | MR438    | 0.392 | 0.772 | 0.855 | -     | -     | -     | 4.839 | 9.147 | 3.203 |
| D283-MS    | T-       | 1.000 | 1.000 | 1.000 | 1.000 | 1.000 | 1.000 | 1.000 | 1.000 | 1.000 |
|            | tufstine | 1.039 | 0.567 | 0.772 | 0.693 | 0.372 | 0.730 | 1.096 | 1.299 | 2.541 |
|            | MR438    | 0.459 | 0.880 | 0.473 | 0.347 | 0.779 | 0.567 | 2.318 | 2.369 | 2.817 |
| D341-MS    | T-       | 1.000 | 1.000 | 1.000 | 1.000 | 1.000 | 1.000 | 1.000 | 1.000 | 1.000 |
|            | tufstine | 1.168 | 0.493 | 0.840 | 0.608 | 0.990 | 0.319 | 0.689 | 0.612 | 0.904 |
|            | MR438    | 0.810 | 0.363 | 0.429 | 0.781 | 0.298 | 0.408 | 0.521 | 0.864 | 0.594 |

“-”: no detectable,  $n = 3$ .

**Supplementary Table 4: Western blot densitometries of peptidomimetic on expression of p-ERK/ERK, p-AKT/AKT, p-SAMAD/ $\beta$ -actin for MB stem cells of MB**

| Protein    |          | p-ERK/ERK |       |       | p-AKT/AKT |       |       | p-SAMAD |       |       |
|------------|----------|-----------|-------|-------|-----------|-------|-------|---------|-------|-------|
| Repetition |          | 1         | 2     | 3     | 1         | 2     | 3     | 1       | 2     | 3     |
|            | T-       | 1.000     | 1.000 | 1.000 | 1.000     | 1.000 | 1.000 | 1.000   | 1.000 | 1.000 |
| DAOY-MS    | tufstine | 0.971     | 0.169 | 0.270 | 0.879     | 0.866 | 0.735 | 0.958   | 0.787 | 0.744 |
|            | MR438    | 0.827     | 0.419 | 0.568 | 0.792     | 0.765 | 0.733 | 1.417   | 0.632 | 0.715 |
|            | T-       | 1.000     | 1.000 | 1.000 | 1.000     | 1.000 | 1.000 | 1.000   | 1.000 | 1.000 |
| D283-MS    | tufstine | 0.856     | 0.962 | 0.849 | 0.369     | 1.213 | 0.501 | 0.724   | 0.809 | 0.834 |
|            | MR438    | 0.983     | 1.082 | 1.177 | 0.282     | 2.015 | 1.038 | 1.413   | 1.477 | 1.134 |
|            | T-       | 1.000     | 1.000 | 1.000 | 1.000     | 1.000 | 1.000 | 1.000   | 1.000 | 1.000 |
| D341-MS    | tufstine | 1.068     | 1.360 | 0.989 | 0.999     | 0.494 | 0.908 | 1.334   | 1.122 | 0.968 |
|            | MR438    | 1.002     | 1.844 | 1.094 | 1.621     | 0.430 | 0.282 | 1.298   | 1.178 | 1.422 |

“-”: no detectable,  $n = 3$ .

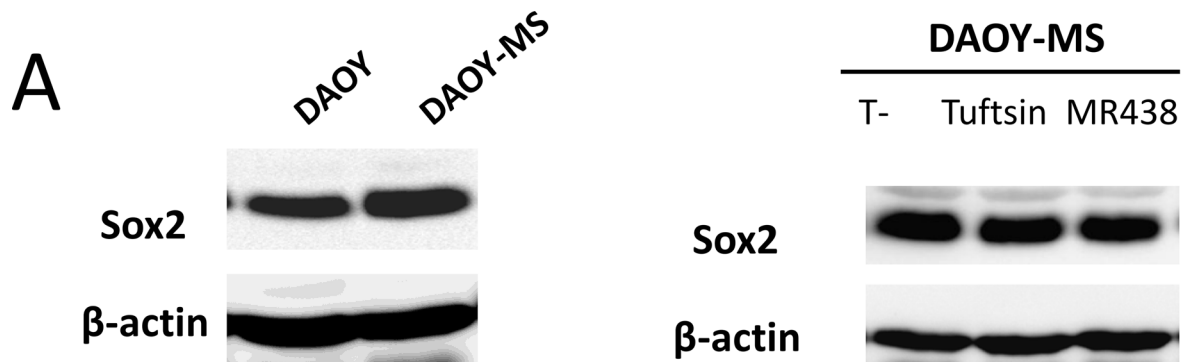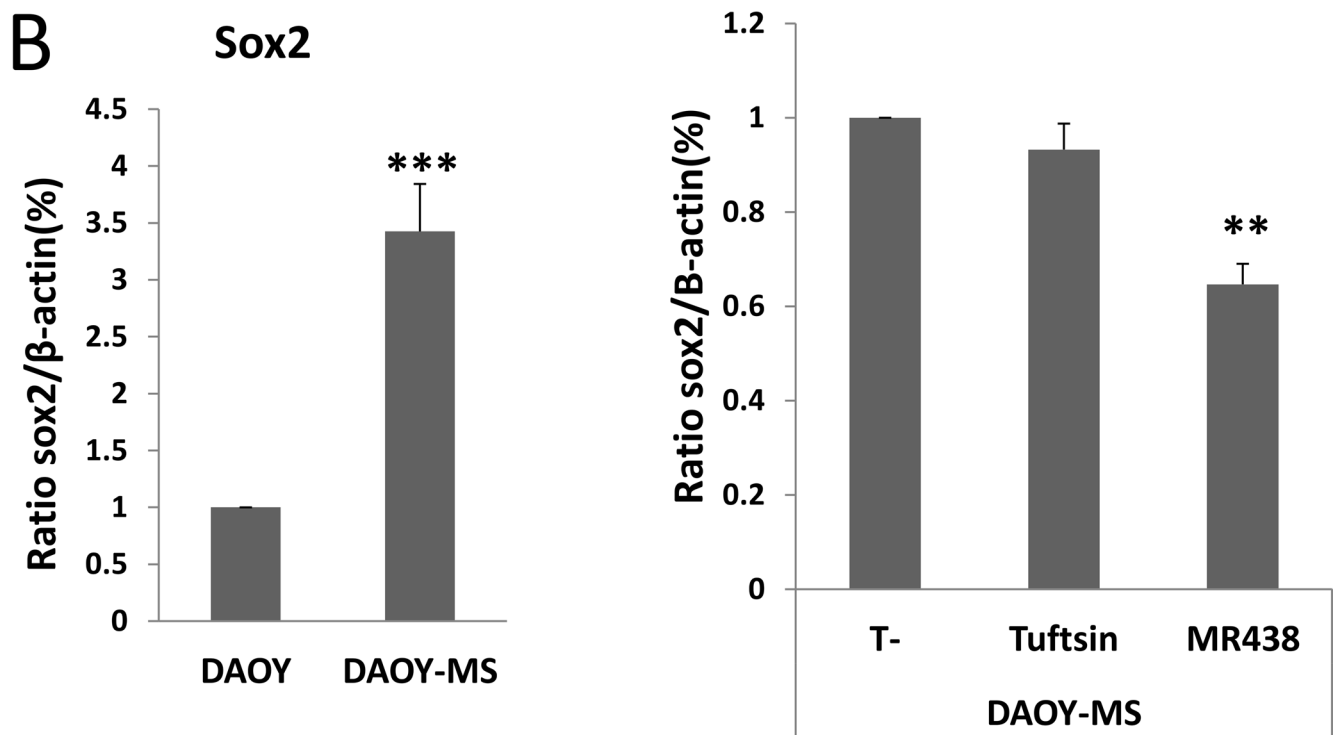

**Supplementary Figure 1: Effect of MR438 and Tuftsin on expression of Sox2 for DAOY.** (A) Representative images of expression of Sox2 for DAOY exposed to MR438 or Tuftsin by Western blot. (B) Ratio of Sox2 expression to  $\beta$ -actin protein for MB stem cells treated by MR438 or Tuftsin for DAOY. \* $p < 0.05$ , \*\* $p < 0.01$ ,  $n = 3$ .

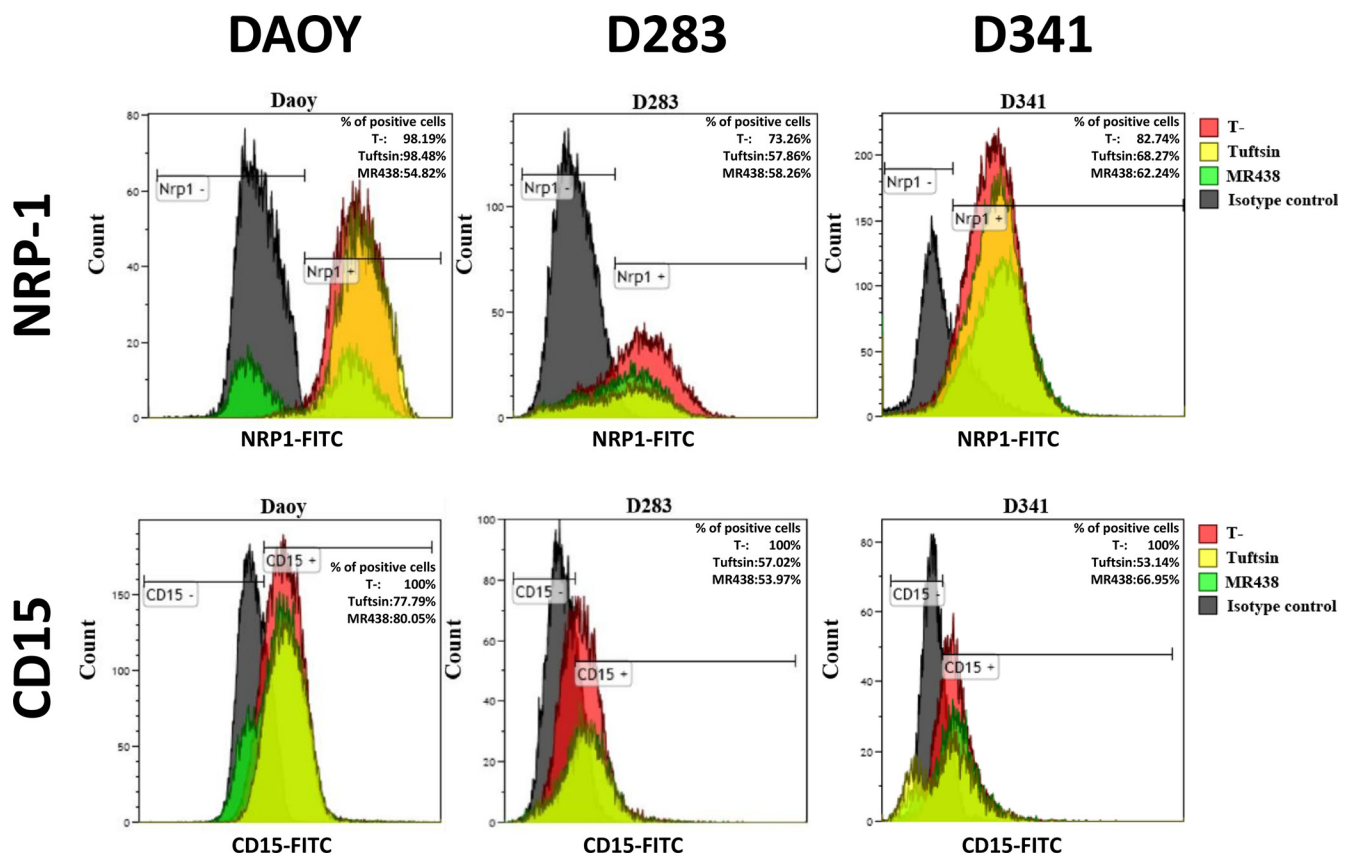

Supplementary Figure 2: Effect of MR438 or Tuftsin on expression of NRP-1 and CD15 by flow cytometry for the 3 MB stem cells models.

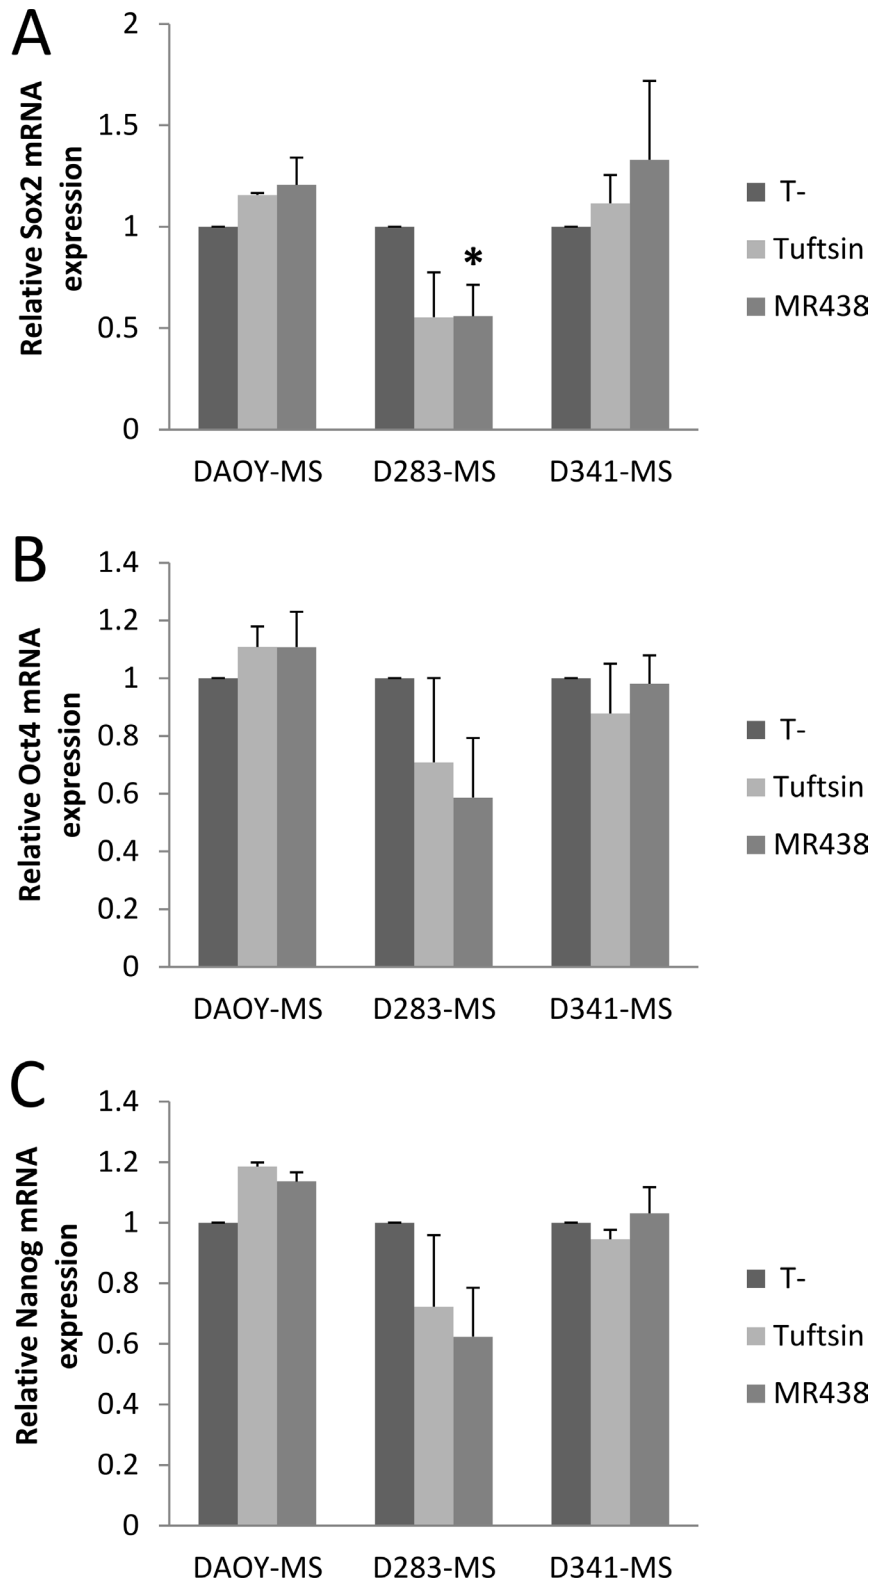

**Supplementary Figure 3: Effect of MR438 and Tuftsin on expression of transcripts by qRT-PCR. (A) Sox2 (B) Oct4 and (C) Nanog. \* $p < 0.05$ ,  $n = 3$ .**
